# Supplementary figures and images for: External Validation of Laboratory-Based Models to Assess Portal Hypertension Severity in Patients with Compensated Chronic Liver Disease
Source: Research Square preprint supplement (doi:10.21203/rs.3.rs-8845244/v1), 2026-02-18

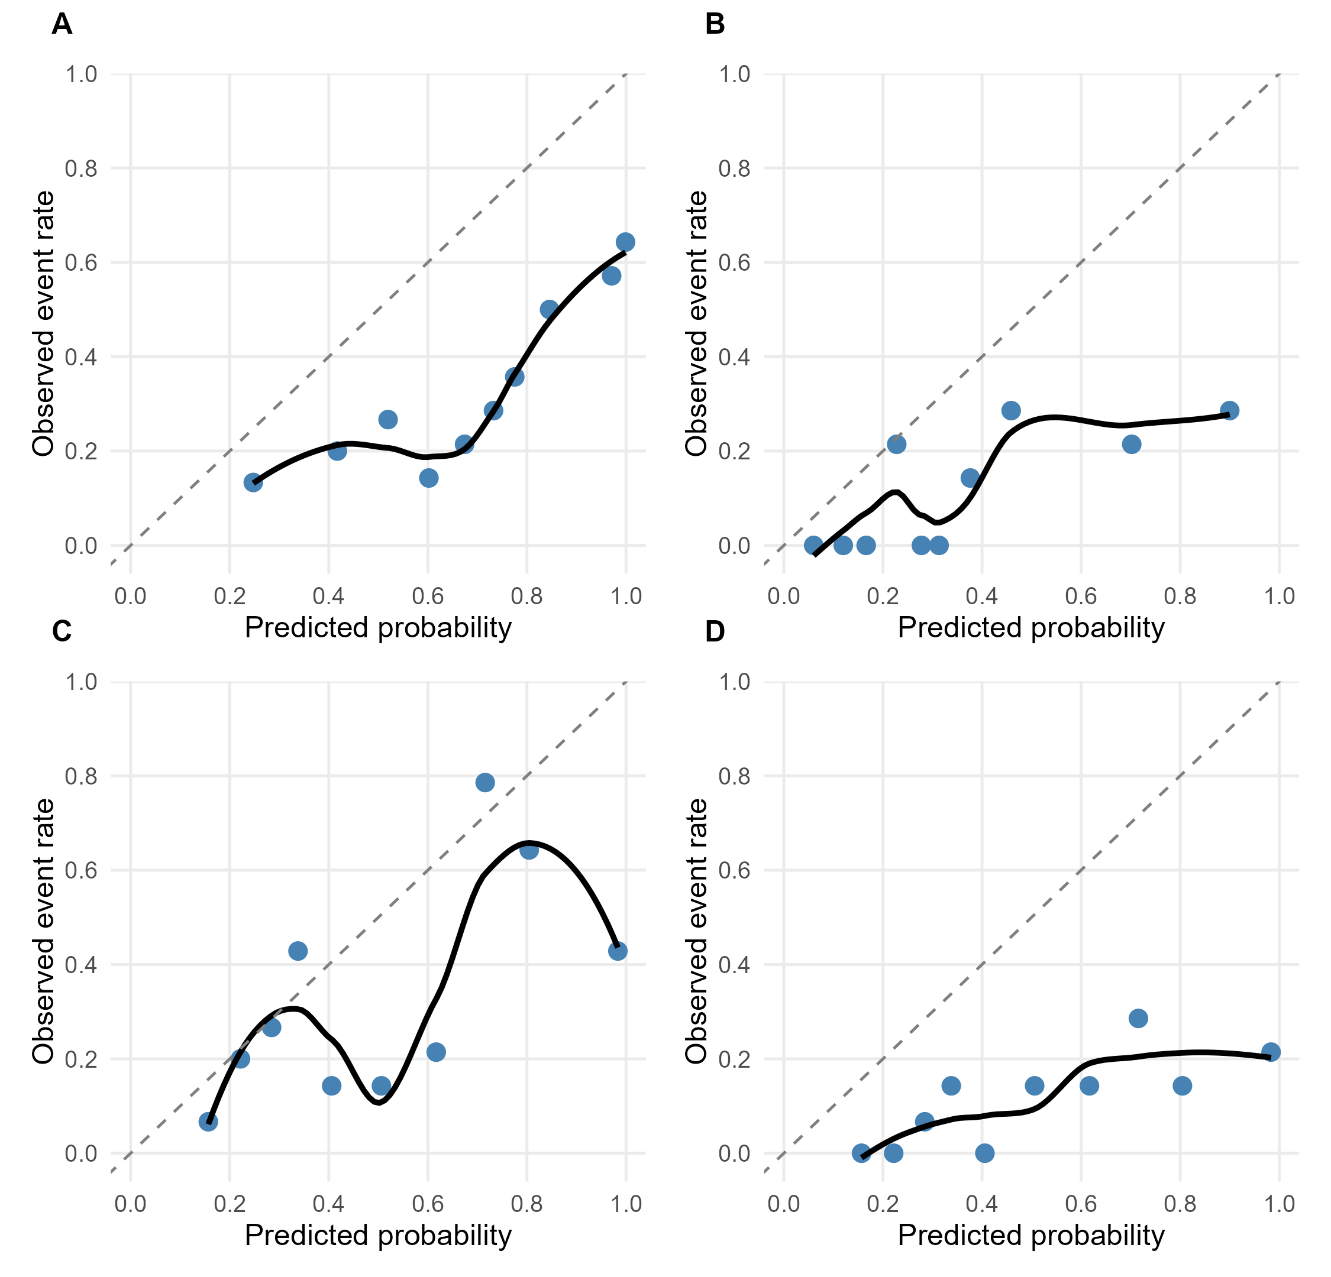


Fig. S1. Calibration plots with LOESS smoothing. A) Vienna ≥10 mmHg, B) Vienna ≥16 mmHg, C) FIB4+ ≥10 mmHg, D) FIB4+ ≥16 mmHG

Supplement: Supplementary file 1 [file 2d499fc1b729a67036cdca24.docx]
